# Supplementary material for: Change in HbA1c Across the Baseline HbA1c Range in Type 2 Diabetes Patients Receiving Once-Weekly Dulaglutide Versus Other Incretin Agents
Source: Springer Nature journal article supplement (doi:10.1007/s13300-019-0625-3), 2019-05-04
Supplement: MOESM1 [file 16700658]

**SUPPLEMENTARY MATERIAL**

Table S1: List of Institutional review boards that approved the AWARD-1, AWARD-5 and AWARD-6 studies.

| **AWARD-1 Ethical Review Board’s**  **Name and Address** | **AWARD-5 Ethical Review Board’s**  **Name and Address** | **AWARD-6 Ethical Review Board’s**  **Name and Address** |
| --- | --- | --- |
| Fundacion Sanatorio Guemes Francisco Acuna de Figueroa 1240 CABA, Buenos Aries C1180AAX Argentina | Comite de Etica de la Facultad de Mediciona de la Unal y Hospital Universitario; | Schulman Associates IRB, Suite 300, 4445 Lake Forest Drive, Cincinnati, OH, 45242, United States |
| Comite de Etica en Investigacion Clinica (CEIC) Larrea 1381 3 A Buenos Aires 1117ABK Argentina | Comité de Bioética Médica del Hospital CIMA Chihuahua  Haciendas del Valle #7120, Plaza Las Haciendas Chihuahua , Cihuahua México | William Beaumont Hospital, Human Inv Committee, 3811 West 13 Mile Road, Royal Oak, MI, 48073, United States |
| Hospital Sirio Libanes Comite de Etica Campana 4658 Ciudad de Buenos Aires CBA 1419 Argentina | Comité de Ética Central Médico Quirúrgica de Aguascalientes.  República del Perú No. 122, Fracc. Las Américas Aguascalientes, Ags. México | Comite de Etica del Hosp Santa Cecilia de Monterrey SA de CV, Comite de Etica. Segundo piso, Isaac Garza Ote # 200 Col. Centro, Monterrey, Nuevo Leon, 64000, Mexico |
| Hospital Universitario UANL Av. Francisco I. Madero Pte. s/n y Dr. E. Aguirre Pequeño. Col. Mitras Centro Edificio Biblioteca Central Facultad Medicina UANL. PB Monterrey, Nuevo Leon 64460 Mexico | Comité de Ética, Investigación y Bioseguridad hospital Bernardette  Av. Hidalgo 930 C.P. 44290 Guadalajara, Jal. México | Hospital Universitario UANL, Av, Francisco 1. Madero Pte s/n y. Dr. E. Aguirre Pequeño. Col. Mitras Centro, Monterrey, Nuevo Leon, 64460, Mexico |
| Instituto Jalisciense de Investigacion en Diabetes y Obesida Instituto Jalisciense de Investigacion ClinicaPenitenciaria No. 20. Col. Centro Comité de Ética IJICSA Guadalajara, Jalisco 44100 Mexico | Comité de Ética Instituto Jaliciense de Investigación Clínica  Penitenciaría No. 20 Col. Centro. Guadalajara, Jal. C.P. 44100 México | Egeszsegugyi Tudomanyos Tanacs, Arany Janos u. 6-8, Budapest, 1051, Hungary |
| Comite Bioetico para la Investigacion Biolinica Puebla 422 -despacho 4 CBIC Despacho 4 Col Roma Sur, Mexico D.F. 06700 Mexico | Comisia Nationala De Etica Pentru Studiu Clinic Al Medicamen  48 Aviator Sanatescu St. Sector 1  Bucharest  011478 | Komisja Bioetyczna przy Okregowej Izbie Lekarskiej w Gdansku, ul. Sniadeckich 33, Gdansk, 80-204, Poland |
| Schulman Associates IRB 4290 Glendale Milford Rd Cincinnati, OH 45242 | Ethikkommission der Aerztekammer Niedersachsen  Berliner Allee 20  30175 Hannover  Germany | Eticka Komise FN Motol, Multicentricka a lokalni eticka komise, V Uvalu 84, Praha 5, 150 06, Czech Republic |
| Thomas Jefferson University 1015 Chestnut Street Philadelphia, PA 19107 | Komisja Bioetyczna przy Uniwersytecie Medycznym w Lublinie, AI. Raclawickie 1, 20-059 Lubin | Eticka komise IKEM a Thomayerovy nemocnice, Lokalni eticka komise, Videnska 800, Praha 4 – Krc, 140 59, Czech Republic |
| University of Hawaii Committee on Human Studies 1960 East West Road Biomedical Bldg Honolulu, HI 98613 | Samsung Medical Center Institutional Review Board  50 Ilwon Dong,  Kang nam Gu, Seoul, Korea 135-710 | Eticka komise NZZ ResTrial s.r.o, Lokalni eticka komise, V sadech 15/4, Praha 6, 160 00, Czech Republic |
| Maine Medical Center 81 Research Drive Scarborough, ME 04074 | Seoul National University,  Bundang Hospital 166 Gumi-Ro, Bundang-Gu, Seongnam-si, Gyeonggido,  463-707,  Korea. | Clinica Mediterranea de Neurociencias, Comite Etico Investigacion Clinica, Camino Viejo de Alicante-Elche s/n, Alicante, 03114, Spain |
| UNC Diabetes Care Center Medical School Bldg 52CB# 7097 Chapel Hill, NC 27599 | Institutional Review Board, Korea University Guro Hospital,  80,  Guro-dong, Guro-gu, Seoul, Korea, 152-703 | CEIC de Islas Baleares, Comite Etico Investigacion Clinica, Camí de Jesús 38A, Palma de Mallorca, Baleares, 07011, Spain |
| Louisiana State University 433 Bolivar Street New Orleans, LA 70122-2223 | NHIC Ilsan Hospital Institutional Review Board,  1232, Baekseok-dong, IlsanDong-Gu, Goyang-Si,  Kyunggi-Do.410-719, Korea | Hospital General De Elda, Comite Etico Investigacion Clinica, Ctra. Elda-Sax la Torreta KM.3, Elda, Alicante, 03600, Spain |
| Hospital of Central Connecticut Human Studies Committee 100 Grand St New Britain, CT 06050 | Kyung Hee University Hospital IRB/IEC,  1 Hoegi-Dong, Dongdaemun-Gu, Seoul, 130-702, Korea | Centre Medic Teknon, Comite Etico Investigacion Clinica, C/Vilana, 12, Barcelona, 08022, Spain |
| WIRB 3535 7th Ave SW Olympia, WA 98502-5010 | Inha University Hospital IRB,  7-206, 3-Ga,  Sinheung-dong Jung-gu, Incheon, Korea 400-711 | CEIC Autonomico de Andalucia Consejería de Salud, Comite Etico Investigacion Clinica, Avda Innovación, Edificio Arena 1Avda Innovacion s/n, Sevilla, 41020, Spain |
| Geisinger Medical Center 100 North Academy Avenue Danville, PA 17822-2600 | Eulji Medical Center Institutional Review Board,  280-1 Hagye-Dong,  Nowon-Gu, Seoul, 139-872, Korea | Hospital de la Ribera, Comite Etico Investigacion Clinica, Carretera Alcira-Corbera s/n, Alcira, Valencia, 46600, Spain |
| University of Illinois College of Medicine Peoria P.O. Box 1649 Peoria, IL 61656-1649 | Bundang CHA General Hospital, 351, Yatapdong, Bundang-gu, Sungnamsi, Kyunggi-do, Seoul, Korea | CEIC Fundacio Unio Catalana Hospital, Comite Etico Investigacion Clinica Attn. Vanessa Masso, Bruc, 72-74, 1a, Barcelona, Catalunia, 08009, Spain |
| Western Institutional Review Board 3535 7th Ave SW Olympia, WA 98502-5010 | The Institutional Review Board of Taichung Veterans General Hospital  No. 160, Section 3, Taichung Port Road, Xitun District, Taichung City 407, Taiwan (R.O.C.) | Comisia Nationala de Etica Pentru Studiul Clinic al Medicame, Str Aviator Sanatescu nr. 48, Bucharest, Sector 1, 011478, Romania |
| Florida Hospital Cancer Institute  212 E Winter Park Street  Orlando, FL 32804 | Research Ethics Committee of National Taiwan University Hospital  No. 1, Chung-Te Street, Taipei City 100, Taiwan (R.O.C.) | EK Kosickeho samospravneho kraja, Nam Maratonu 1, Kosice, Slovak Republic, 04266, Slovakia |
| Intermountain Health Care, Inc  36 S. State Street  Salt Lake City, UT 84111 | National Cheng-Kung University Hospital Institutional Review Board  No. 138, Shengli Road, Tainan City 704, Taiwan (R.O.C.) | Bratislavsky Samospravny Kraj, Sabinovska 16 PO Box 106, Bratislava, Slovak Republic, 820 05, Slovakia |
| Queens Medical Center and Cancer Institute  1301 Punchbowl St  Honolulu, HI 96813 | Kaohsiung Medical University Chung-Ho Memorial Hospital Institutional Review Board  8th Floor, Building A, No. 100, Tzyou 1st Road, Kaohsiung City 807, Taiwan (R.O.C.) | Nitriansky samospravny kraj, Stefanikova trieda 69, Nitra, Slovakia, 94901, Slovakia |
| Greenville Hospital System  110 North Main Street  Greenville, SC16125 | Joint Institutional Review Board  No. 5-1, Ln. 331, Sec. 2, Shipai Rd., Beitou Dist., Taipei City 112, Taiwan (R.O.C.) | Eticka komisia Trencianskeho sam kraja, K dolnej stanici 7282/20A, 911 01 Trenčin, Starohajska 10, Trencin, 91701, Slovakia |
| State University of NY  3435 Main Street  Buffalo, NY 14214-3016 | Chung Shan Medical  University Hospital Institutional Review Board  No. 110, Section 1, Chien-Ku North Road, South District, Taichung City 402, Taiwan (R.O.C.) | Ethikkommission bei der Sächsischen Landesärztekammer, EK-AMG-MCF-10/12-1. Schützenhöhe 16, Dresden, 01099, Germany |
|  | College of Physicians and Surgeons of Alberta 2700, 10020-100 Street NE Edmonton, AB T5J ON3 |  |
|  | IRB Services, 372 Hollandview Trail Ste 300, Aurora, ON L4G 0A5 |  |
|  | University of Manitoba  Biomedical Research Ethics Board  Bannatyne Campus  P126 770 Bannatyne Ave.  Winnepeg Manitoba R3E OWs |  |
|  | Comité de Protection des personnes Est III  Hopital de Barbois  Rue du Morvan  54511 VANDOEUVRE-LES-NANCY cedex  France |  |
|  | LEC of Municipal Healthcare Institution «First City Clinical Emergency Hospital»,  1, Suvorova st., Arkhangelsk, 163045, |  |
|  | LEC of State Educational Institution of High Professional Education “Rostov State Medical University of RosZdrav”, 29, Nakhichevansky lane, Rostov-on-Don, 344022 |  |
|  | LEC of State Healthcare Institution "Arkhangelsk regional clinical hospital" 292, prospect Lomonosova, 163045, Arkhangelsk, Russia |  |
|  | LEC of “St. Elizabeth City Clinical Hospital” 14 Vavilovykh str., St. Petersburh, Russia, 163045 |  |
|  | S-B-5 Shastri Nagar St Mary School, Ghaziabad Uttar Pradesh 201-002 |  |
|  | #35 5th Cross, Maleshwaram Circle Bangalore, Kamataka 560003 |  |
|  | 6 Poonam Arcade, 1170/11 Pune 411005 |  |
|  | 201 Silver Brook B Opp Doctor House, Ellisbridge 38006 |  |
|  | 640 1st Main, 1st Stage Indiranagar Bangalore Kamataka 560038 |  |
|  | KEM Hospital Research Centre,Sardar Moodliar Road,Rasta Peth,Pune,411011 |  |
|  | 16/M Millers Tank Bed Area, Thimmalah Road Vasanthnagar Bangalore Kamataka 560 052 |  |
|  | Amrita Lane Ellamakkara POEdapally Kochi Kerala 682026 |  |
|  | Jubilee Hills Hyderbad Andhra Pradesh 500033 |  |
|  | Hospital Universitari Arnau De Vilanova  Av Alcalde Rovira Roure 80  Lleida  Catalonia  25198 |  |
|  | Chesapeake Research Review 7063 Columbia Gateway Drive Columbia MD 21046 |  |
|  | Schulman Associates IRB 4920 Glendale Milford Rd Cincinnati OH 45242 |  |
|  | Hunterdon Medical Center 2100 Westcott Dr Flemington NJ 08822 |  |
|  | Emory University 1599 Clifton Rd Atlanta GA 30322 |  |
|  | University of Michigan 517 W William Ann Arbor MI 48103 |  |
|  | Institutional Review Board for the Protection of Human Subjects 750 East Adams St Syracuse NY 13210 |  |
|  | ViaHealth Clin Investigtn Comm 1425 Portland Ave Rochester NY 14621 |  |

Table S2: Least squares mean (95% CI) reductions from baseline in HbA1c (mmol/mol) across the range of baseline HbA1c in AWARD-5, AWARD-6 and AWARD-1

| Study (week 26) | Baseline HbA1c (mmol/mol) | | | | | | | | | |
| --- | --- | --- | --- | --- | --- | --- | --- | --- | --- | --- |
| Treatment | 47.53 | 53.00 | 58.46 | 63.93 | 69.39 | 74.86 | 80.32 | 85.79 | 91.25 | 96.72 |
| AWARD-51 |  |  |  |  |  |  |  |  |  |  |
| DU 0.75 | - | −7.32  (−8.96,  −5.68) | −8.85  (−10.17, −7.54) | −10.38  (−11.59, −9.29) | −12.02  (−13.23, −10.82) | −13.55  (−14.98, −12.13) | −15.09  (−16.83, −13.45) | − | - | - |
| DU 1.5 | - | −7.76  (−9.40,  −6.12) | −10.17  (−11.48, −8.85) | −12.57  (−13.77, −11.48) | −14.98  (−16.18, −13.77) | −17.38  (−18.80, −15.96) | −19.79  (−21.53, −18.04) | − | - | - |
| SITA | - | −3.94  (−5.47,  −2.40) | −5.03  (−6.23,  −3.72) | −6.12  (−7.21,  −5.03) | −7.21  (−8.42,  −6.01) | −8.31  (−9.73,  −6.89) | −9.40  (−11.15, −7.65) | − | - | - |
| AWARD-62 |  |  |  |  |  |  |  |  |  |  |
| DU 1.5 | - | −10.38  (−12.02, −8.75) | −13.12  (−14.32, −11.81) | −15.74  (−16.83, −14.76) | −18.47  (−19.68, −17.27) | −21.21  (−22.85, −19.57) | −23.83  (−26.02, −21.75) | −26.56  (−29.30, −23.94) | - | - |
| LIRA 1.8 | - | −9.18  (−10.93, −7.54) | −12.13  (−13.45, −10.82) | −15.09  (−16.18, −13.99) | −18.04  (−19.24, −16.83) | −20.99  (−22.52, −19.35) | −23.83  (−26.02, −21.75) | −26.78  (−29.51, −24.16) | − | − |

| AWARD-11 |  |  |  |  |  |  |  |  |  |  |
| --- | --- | --- | --- | --- | --- | --- | --- | --- | --- | --- |
| DU 0.75 | −6.01  (−7.76, −4.26) | −8.75  (−10.71, −7.21) | −11.37  (−12.68, −10.06) | −14.10  (−15.41, −12.79) | −16.83  (−18.15, −15.41) | −19.46  (−21.10, −17.93) | −22.19  (−24.05, −20.33) | −24.92  (−27.11, −22.74) | −27.66  (−30.17, −25.14) | −30.28  (−33.23, −27.44) |
| DU 1.5 | −7.21  (−8.96, −5.36) | −10.28  (−11.81, −8.75) | −13.34  (−14.65, −12.02) | −16.40  (−17.71, −15.09) | −19.46  (−20.77, −18.15) | −22.52  −24.05, −21.10) | −25.58  (−27.33, −23.94) | −28.75  (−30.72, −26.67) | −31.81  (−34.11, −29.51) | −34.87  (−37.49, −32.25) |
| EXE | −1.86  (−3.61, −0.11) | −4.81  (−6.34,  −3.28) | −7.76  (−9.07,  −6.45) | −10.49  (−12.02, −9.40) | −13.66  (−14.98, −12.35) | −16.62  (−18.15, −15.19) | −19.57  (−21.32, −17.82) | −22.52  (−24.60, −20.55) | −25.47  (−27.87, −23.17) | −28.53  (−31.15, −25.80) |

The table shows data from patients receiving active treatment in the intention-to-treat populations of AWARD-5, -6 and -1 whose baseline HbA1c met the inclusion criteria for their respective study.

ANCOVA: analysis of covariance; CI: confidence interval; DU: dulaglutide (dose in mg); EXE: exenatide twice daily; LIRA: liraglutide (dose in mg); LOCF: last observation carried forward; SITA: sitagliptin.

1 LOCF ANCOVA Model: Change in HbA1c = Treatment + Country + Baseline HbA1c + Treatment*Baseline HbA1c

Table S3: Assessment of association of baseline HbA1c and change in HbA1c through backward selection in AWARD-5, AWARD-6 and AWARD-1

| StudStudya Study | Population | No. | Model (LOCF ANCOVA): Change in HbA1c from baseline to week 26 = | Factor to be excluded as chosen through backward selectiona (*P* value) |
| --- | --- | --- | --- | --- |
| AWARD-5 | ITT | 1 | treatment + country + baseline HbA1c + baseline HbA1c² | baseline HbA1c² (0.271) |
| 2 | treatment + country + baseline HbA1c | None (i.e. selection stopped) |
| AWARD-6b | ITT | 1 | treatment + pooled country + baseline HbA1c + baseline HbA1c² | baseline HbA1c² (0.704) |
| 2 | treatment + pooled country + baseline HbA1c | treatment (0.341)c |
| 3 | pooled country + baseline HbA1c | None (i.e. selection stopped) |
| AWARD-1 | ITTd | 1 | treatment + country + baseline HbA1c + baseline HbA1c2 | baseline HbA1c (0.971) |
| 2 | treatment + country + baseline HbA1c2 | country (0.505) |
| 3 | treatment + baseline HbA1c2 | None (i.e. selection stopped) |
| AWARD-1 | Baseline HbA1c as per inclusion criteriond | 1 | treatment + country + baseline HbA1c + baseline HbA1c2 | baseline HbA1c² (0.666) |
| 2 | treatment + country + baseline HbA1c | country (0.622) |
| 3 | treatment + baseline HbA1c | None (i.e. selection stopped) |

ANCOVA: analysis of covariance; ITT, intent-to-treat; LOCF: last observation carried forward.

a Criterion for backward selection: *P*-value ≥0.15.

b The LOCF ANCOVA model was a secondary sensitivity analysis for the primary endpoint (Dungan et al., 2014).

c The factor ‘treatment’ was excluded as a result of backward selection because dulaglutide 1.5mg was non-inferior but not superior to liraglutide 1.8mg in AWARD-6 (Dungan et al., 2014).
For the purpose of the current analysis, the factor ‘treatment’ had to be retained in the model.

d Inclusion criterion: 6.5% < baseline HbA1c ≤11.0%
The different results between the ITT population and the population restricted to baseline HbA1c values as per the inclusion criterion, as well as further inspection of baseline HbA1c values, led to the conclusion that the backward selection results for the ITT population were only driven by a few extreme baseline HbA1c values.
Therefore, a linear association between baseline HbA1c and change in HbA1c was also assumed for the ITT population.
For the purpose of the current analysis, the factor ‘country’ was retained in the model to remain consistent with the primary analysis (Wysham et al., 2014).
